# Supplementary material for: Unexpected effect of tetraglyme plasticizer on lithium ion dynamics in PAMPS based ionomers
Source: Royal Society of Chemistry journal article supplement (doi:10.1039/c6cp03689a), 2016-01-01
Supplement: c6cp03689a1.pdf [file c6cp03689a1.pdf]

# **Unexpected effect of tetraglyme plasticizer on lithium ion dynamics in PAMPS based ionomers**

Yogita V.Oza<sup>a</sup>, Douglas R. MacFarlane<sup>b,c</sup>, Maria Forsyth<sup>a,c\*</sup> and Luke A. O'Dell<sup>a</sup>

<sup>a</sup>Institute for Frontier Materials, Deakin University, Waurn Ponds Campus,  
Geelong, Victoria, Australia

<sup>b</sup>School of Chemistry, Monash University, Clayton Campus, Victoria, Australia

<sup>c</sup>ARC Centre of Excellence for Electromaterials Science (ACES), Australia

\*Corresponding author: [maria.forsyth@deakin.edu.au](mailto:maria.forsyth@deakin.edu.au)

## **Supporting Information**

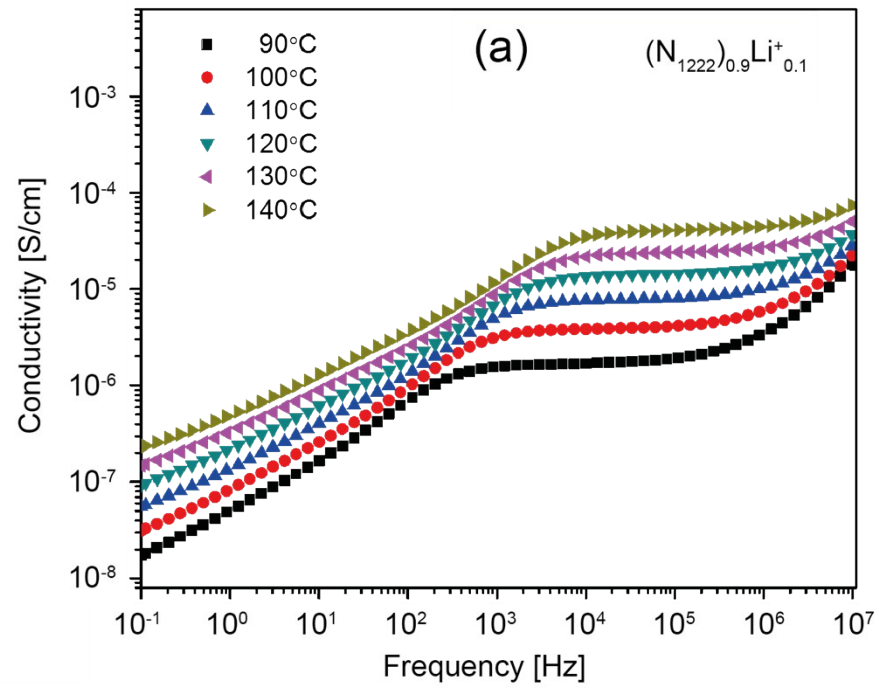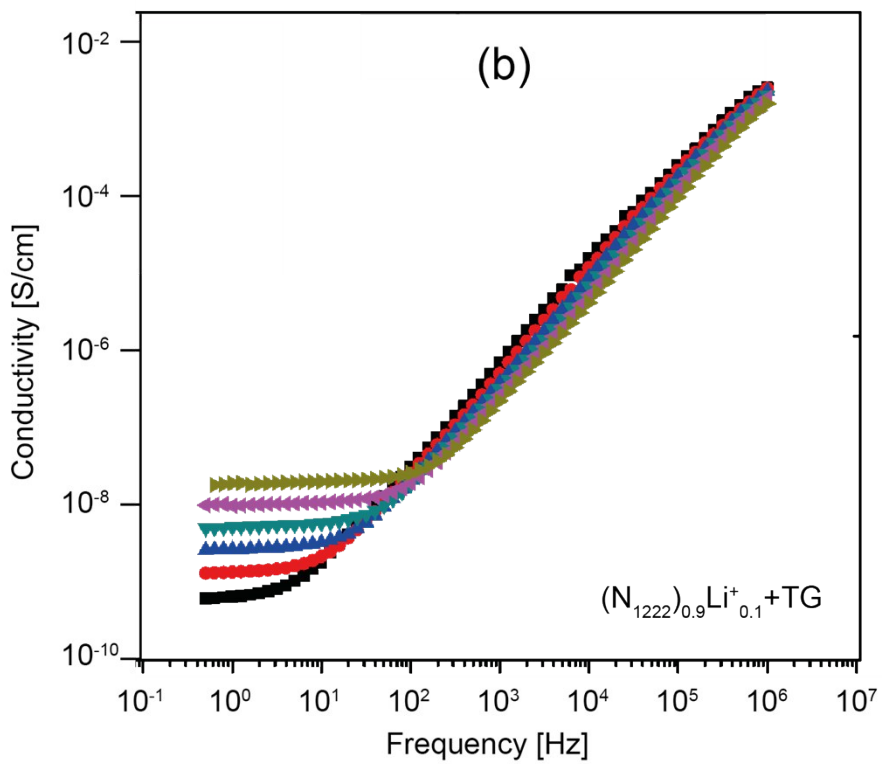

Figure S1. AC conductivity as a function of frequency for  $(N_{1222})_{0.9}Li_{0.1}$  (a) and with 10wt% tetraglyme (b)

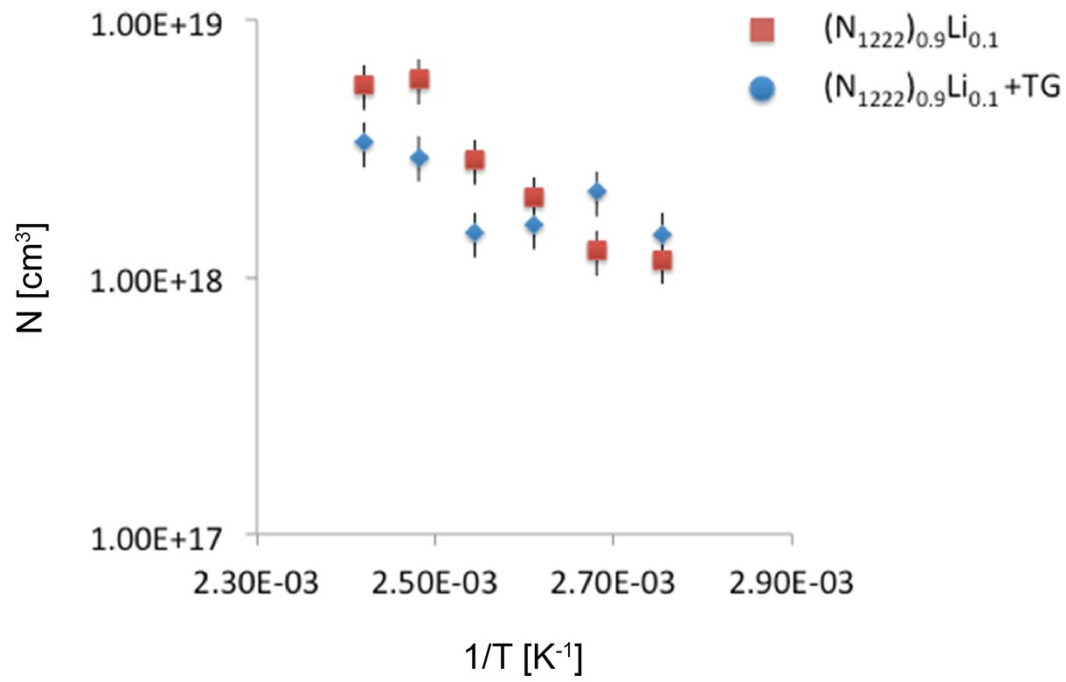

Figure S2. Number of charge carriers determined from the analysis of J.C. Dyre, P.Maass, B. Roling and D.L. Sidebottom, Rep. Prog. Phys. 72 (2009) 046501
